# Supplementary material
Source: PubMed Central journal article supplement (PMC4291490)
Supplement: cdd2014142x1.pdf [file cdd2014142x1.pdf]

## Supplementary Figures

### **Polycomb-mediated loss of microRNA let-7c determines inflammatory macrophage polarization via PAK1-dependent NF- $\kappa$ B pathway**

Weijuan Zhang<sup>1</sup>, Haiou Liu<sup>2</sup>, Weisi Liu<sup>2</sup>, Yidong Liu<sup>2</sup> and Jiejie Xu<sup>\*,2</sup>

<sup>1</sup>Department of Immunology, School of Basic Medical Sciences, Shanghai Medical College of Fudan University, Shanghai 200032, China.

<sup>2</sup>Key Laboratory of Glycoconjugate Research, MOH, Department of Biochemistry and Molecular Biology, School of Basic Medical Sciences, Shanghai Medical College of Fudan University, Shanghai 200032, China.

\*Corresponding author: Dr. Jiejie Xu, Department of Biochemistry and Molecular Biology, School of Basic Medical Sciences, Shanghai Medical College of Fudan University, Shanghai 200032, China. Tel: (86) 21-54237332; Fax: (86) 21-64437203; E-mail: [jjxufdu@fudan.edu.cn](mailto:jjxufdu@fudan.edu.cn)

**Running Title:** PAK1 dictates inflammatory macrophage polarization.

## Supplementary Figure 1

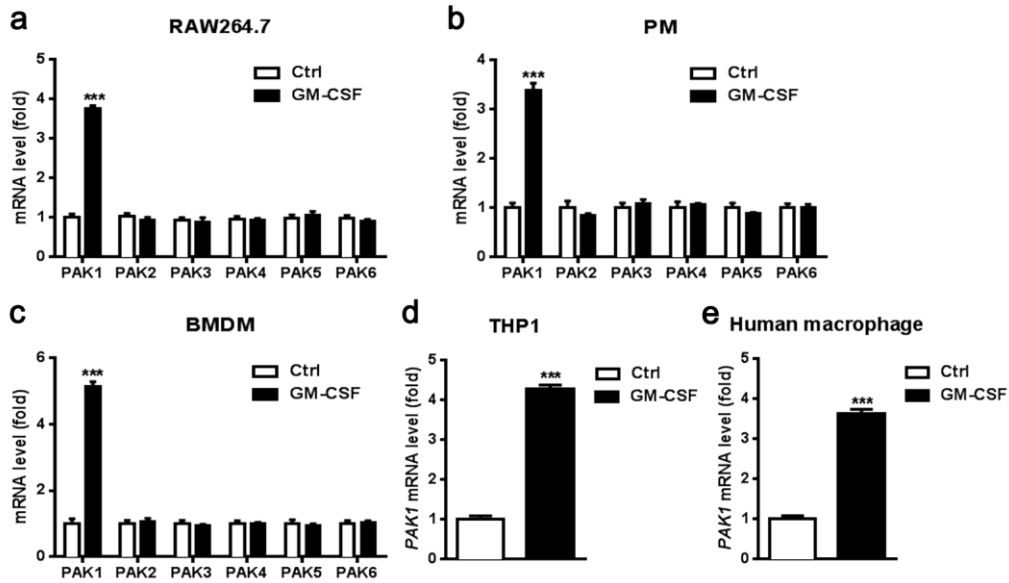

**Supplementary Figure 1.** PAK1 expression is augmented by inflammatory stimuli in macrophages. (a-c) *PAK1* mRNA levels were assessed by real-time PCR and normalized to *GAPDH* in RAW264.7 cells (a), mouse peritoneal macrophages (PMs) (b), and bone marrow-derived macrophages (BMDMs) (c) after 12 hr of stimulation with GM-CSF (50 ng/ml). (d and e) *PAK1* mRNA levels were quantified by real-time PCR and normalized to *GAPDH* in THP1 cells (d) or GM-CSF-differentiated primary human macrophages (e) stimulated with GM-CSF for 12 hr. Data are from five independent experiments (mean  $\pm$  SEM). \*\*\* $P < 0.001$ .

## Supplementary Figure 2

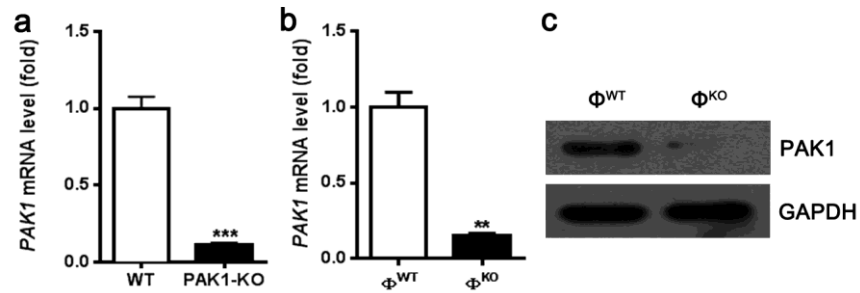

**Supplementary Figure 2.** Efficient deletion of PAK1 in macrophages. **(a)** Real-time PCR analysis of *PAK1* mRNA expression in BMDMs from *PAK1<sup>fl/fl</sup>, Mx1-Cre* (PAK1-KO) mice and *PAK1<sup>+/+</sup>, Mx1-Cre* (wild-type; WT) littermate controls. **(b and c)** Real-time PCR and immunoblot analysis of PAK1 expression in BMDMs from myeloid-specific PAK1-deficient ( $\Phi^{KO}$ ) mice and wide type ( $\Phi^{WT}$ ) mice. Results are averaged from six independent experiments (a and b; mean  $\pm$  SEM) or one experiment representative of three independent experiments with similar results (c). \*\* $P < 0.01$ , \*\*\* $P < 0.001$ .

### Supplementary Figure 3

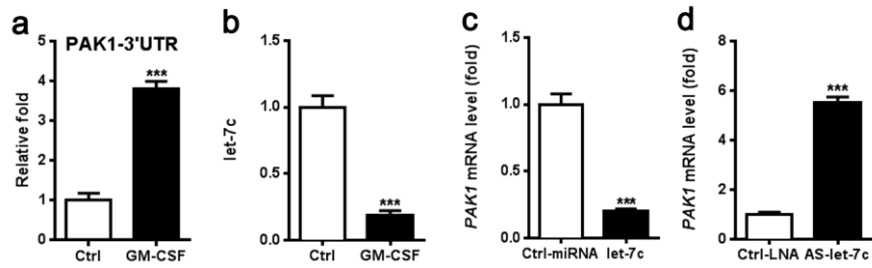

**Supplementary Figure 3.** *PAK1* mRNA is identified as a *bona fide* target of miR-let-7c in M1 macrophages. (a) Luciferase activities for transfected *PAK1* 3'UTR were measured and normalized to *Renilla* luciferase activities in RAW264.7 cells after GM-CSF (50 ng/ml) stimulation. (b) Relative levels of let-7c were measured by real-time PCR and normalized to U6 levels in RAW264.7 cells after GM-CSF (50 ng/ml) stimulation. (c and d) *PAK1* mRNA levels were assessed by real-time PCR and normalized to *GAPDH* in RAW264.7 cells transfected with 40 nM of let-7c mimics (c) and 40 nM of AS-let-7c oligos (d) after stimulated with GM-CSF (50 ng/ml) for 12 hr. Data are from at least four independent experiments (mean  $\pm$  SEM). \*\*\* $P < 0.001$ .

## Supplementary Figure 4

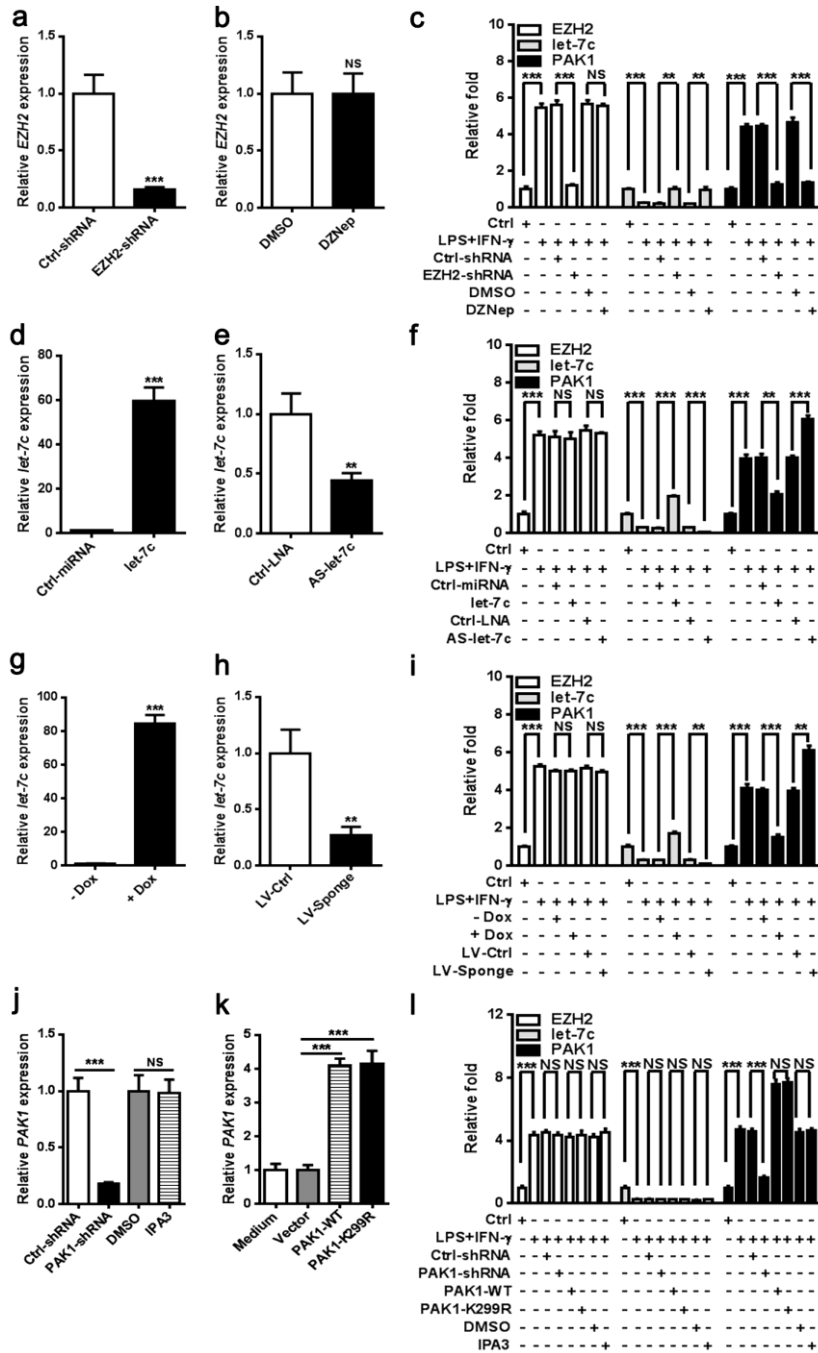

**Supplementary Figure 4.** Regulation of EZH2/let-7c/PAK1 expression in macrophages. Expression levels of EZH2, let-7c, and PAK1 were quantified by real-time PCR and normalized to *GAPDH* and *U6*, respectively, in LPS plus IFN- $\gamma$ -treated RAW264.7 cells after EZH2-shRNA introduction or DZNep treatment (**a-c**), LPS plus IFN- $\gamma$ -treated RAW264.7 cells after let-7c mimics or AS-let-7c oligos introduction (**d-f**), LPS plus IFN- $\gamma$ -treated RAW264.7 cells after let-7c sponge lentivirus introduction or RAW264.7 Tet-on-let-7c cells with or without Dox treatment (**g-i**), and LPS plus IFN- $\gamma$ -treated RAW264.7 cells after PAK1-shRNA introduction, PAK1-K299R transfection, or IPA3 treatment (**j-l**). Data are from four independent experiments (mean  $\pm$  SEM). \*\* $P < 0.01$ , \*\*\* $P < 0.001$ , NS indicates not significant.

Supplementary Figure 5

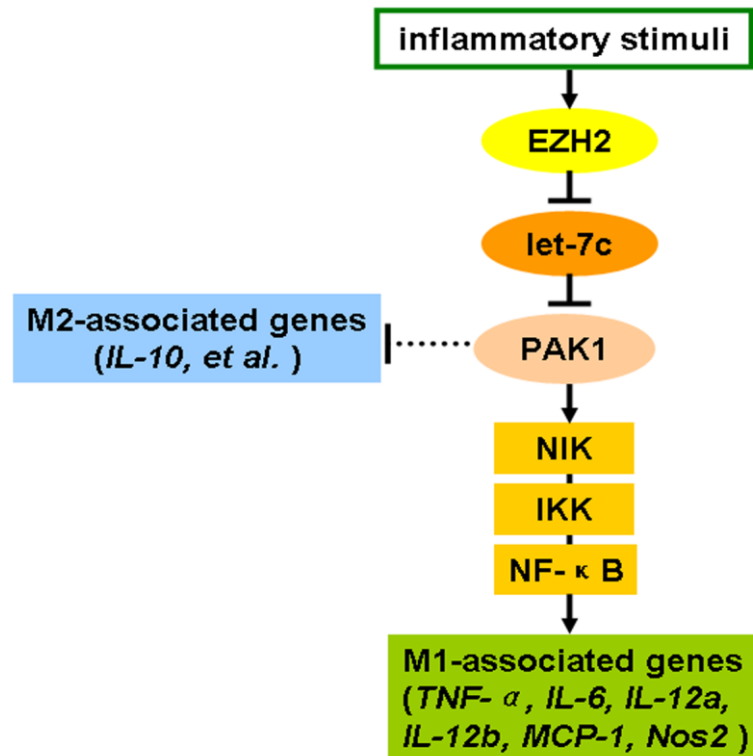

**Supplementary Figure 5.** A model of coordinated regulation of M1 versus M2 transcription programs by PAK1. Epigenetic loss of microRNA let-7c due to EZH2 upregulation determined PAK1 elevation in inflammatory stimuli-induced M1 macrophages. PAK1 signaling via NIK-IKK-NF- $\kappa$ B is essential for inflammatory stimuli-induced expression of a subset of prototypical M1 genes such as *TNF- $\alpha$* , *IL-6*, *IL-12a*, *IL-12b*, *MCP-1*, and *Nos2*. In addition, PAK1 also suppresses expression of genes essential for M2 polarization such as *IL-10*. Thus, PAK1 regulates the balance between alternative macrophage differentiation programs by supporting the M1 phenotype while blocking M2 polarization.
